# Supplementary material for: The associations between maternal and child diet quality and child ADHD – findings from a large Norwegian pregnancy cohort study
Source: Springer Nature journal article supplement (doi:10.1186/s12888-021-03130-4), 2021-03-08
Supplement: MOESM2 [file 18940932]

## PDQI score calculation

We calculated the PDQI score using the method put forward by von Ruesten et al. [1] and modified it to correspond to the updated Norwegian food-based dietary guidelines [2]. The PDQI consists of 13 components, with a maximum score of ten per component (with the exception of total fish and fatty fish), for a maximum PDQI score of 120. We used different formulae to calculate scores depending on the intake recommendation for each included food group/nutrient:

- 1) For food groups with a minimum intake recommendation (fruit/berries, vegetables, and whole-grain, dairy):  $PDQI\ score = \left( \frac{Reported\ intake}{Recommended\ intake} \right) \times 10$ . For intakes above recommended minimum intake, we allocated a maximum score of 10.
- 2) For food groups and nutrients with a maximum intake recommendation (red meat, saturated fat, trans-fat, added sugar, salt):  $PDQI\ score = \left( \frac{Recommended\ intake}{Reported\ intake} \right) \times 10$ . For intakes below recommended maximum intake, we allocated a maximum score of 10.
- 3) For food groups with both a minimum and maximum recommendation (total fish and fatty fish) we used the formulae in 1) and 2) for intakes below the lower recommended intake level and above the upper recommended intake level, respectively. As to not overemphasize fish intake in the total PDQI score (as fatty fish is part of the total fish component), we divided the scores for total fish and fatty fish by two, with a possible maximum score of 5 for each component. For intakes within the recommended intake range, we allocated the maximum score.

## Diet diversity

To reflect each participant's diet variation on a food level we included diet diversity as an additional component in the PDQI. There are recommendations regarding diet variation in the Norwegian food-based dietary guidelines, which justify inclusion of these components.

The diet diversity component is based on the diet diversity component from the revised Diet Quality Index (DQI-R) [3] and we follow the score calculation put forward by the DQI-R authors. This component reflects the intake variation of 25 food categories, depicted in table 2, with a higher score equaling greater diversity. To get a positive score for each food category, the participant had to have eaten a  $\frac{1}{4}$  serving of that respective food per day, with an overall maximum diet diversity score of 10.

Supplementary Table. Diet Diversity Component Overview

| <b>Food groups</b>                 | <b>Representative foods</b>                                                           | <b>¼<br/>portion<br/>(grams)</b> |
|------------------------------------|---------------------------------------------------------------------------------------|----------------------------------|
| <b>Grains</b>                      |                                                                                       |                                  |
| Non-whole-grain breads             | Low fiber bread, crispbread and biscuits                                              | 10                               |
| Non-whole-grain cereals            | Low fiber cereals                                                                     | 13                               |
| Non-whole-grain<br>crackers        | Low fiber crispbread and biscuits                                                     | 2                                |
| Pasta                              | All pasta dishes                                                                      | 50                               |
| Whole-grain breads                 | High fiber bread and crispbread                                                       | 11                               |
| Whole-grain crispbread             | High fiber crispbread                                                                 | 2.5                              |
| Whole-grain cereals                | High fiber muesli and porridge                                                        | 33                               |
| Rice                               | Rice and couscous                                                                     | 43                               |
| <b>Vegetables</b>                  |                                                                                       |                                  |
| Other vegetables                   | Alliums, mushrooms, peppers, cucumber,<br>celery, squash, corn, tomato, peas, avocado | 25                               |
| White potatoes                     | Mashed and fried potatoes, French fries                                               | 30                               |
| Nuts                               | Almonds, peanuts, other nuts                                                          | 13                               |
| Legumes                            | Lentils, kidney beans, soy products                                                   | 56                               |
| Root vegetables                    | Swede, carrot                                                                         | 25                               |
| Cabbage vegetables                 | Cauliflower, broccoli, cabbage, brussels<br>sprouts                                   | 25                               |
| Dark green and leafy<br>vegetables | Spinach, lettuce                                                                      | 25                               |
| <b>Fruits</b>                      |                                                                                       |                                  |
| Citrus fruit, melons,<br>berries   | Orange, grapefruit, all berries                                                       | 25                               |
| All other fruits and juices        | Apples, bananas, grapes, raisins, pear,<br>mango, papaya, plums                       | 25                               |
| <b>Animal components</b>           |                                                                                       |                                  |
| Red meat                           | Beef, pork, lamb, offal                                                               | 34-71                            |
| Milk                               | Plain milk, chocolate milk                                                            | 50                               |
| Game                               | Reindeer, moose, wild boar                                                            | 38                               |
| Poultry                            | Chicken, turkey                                                                       | 38                               |
| Cheese                             | White cheese, brown cheese, blue cheese                                               | 5                                |
| Eggs                               | Eggs, seagull eggs                                                                    | 14                               |
| Fish                               | Seafood, lean fish, fatty fish, fish roe, fish<br>fingers                             | 11                               |
| Yogurt                             | Yoghurt, probiotic milk                                                               | 31                               |

## References

1. von Ruesten, A., et al., *Adherence of pregnant women to Nordic dietary guidelines in relation to postpartum weight retention: results from the Norwegian Mother and Child Cohort Study*. BMC Public Health, 2014. **14**: p. 75.
2. Norwegian Directorate of Health, *Norwegian guidelines on diet, nutrition and physical activity [in Norwegian]*. 2014: Oslo, Norway.
3. Haines, P.S., A.M. Siega-Riz, and B.M. Popkin, *The Diet Quality Index Revised*. Journal of the Academy of Nutrition and Dietetics, 1999. **99**(6): p. 697-704.
