# Supplementary material for: The associations between maternal and child diet quality and child ADHD – findings from a large Norwegian pregnancy cohort study
Source: Springer Nature journal article supplement (doi:10.1186/s12888-021-03130-4), 2021-03-08
Supplement: MOESM3 [file 18940932]

Supplementary Table: Foods and beverages from group 4 in the NOVA classification included in the Ultra-Processed Food Index (UPFI)

---

Food and beverage groups

---

**Alcoholic beverages**

**Bacon**

**Biscuits**

**Cereals with added sugars**

**Drinks with artificial sweeteners**

**Fish sticks**

**French fries**

**Hamburgers**

**Ice creams**

**Lunch meats**

**Margarines**

**Meat spreads**

**Pastries**

**Pizza**

**Powdered soups and sauces**

**Sausages**

**Savoury snacks**

**Store bought condiments**

**Sugar added to foods/beverages**

**Sugary spreads**

**Sweets/candies**

**White bread**

---
