# Supplementary material for: The associations between maternal and child diet quality and child ADHD – findings from a large Norwegian pregnancy cohort study
Source: Springer Nature journal article supplement (doi:10.1186/s12888-021-03130-4), 2021-03-08
Supplement: MOESM5 [file 18940932]

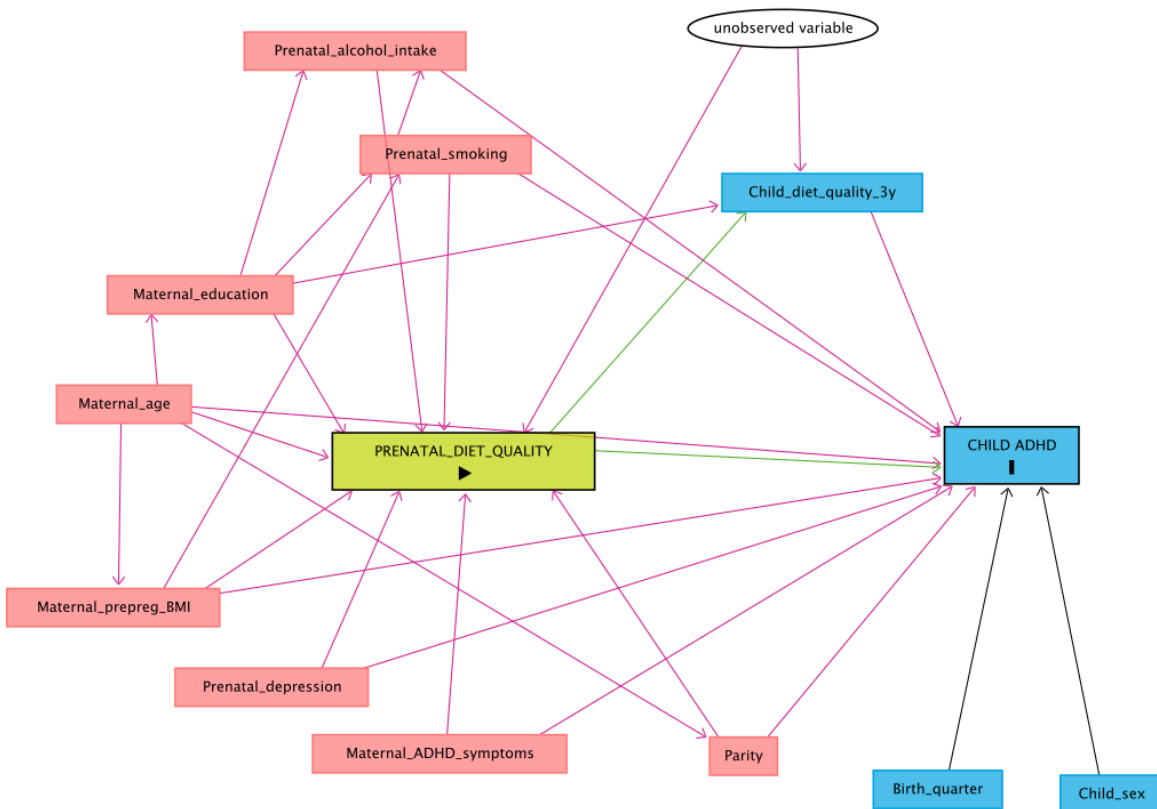

Supplementary Figure: Visualization of covariate selection for prenatal diet quality as exposure via a Directed Acyclic Graph
