# Supplementary material for: The associations between maternal and child diet quality and child ADHD – findings from a large Norwegian pregnancy cohort study
Source: Springer Nature journal article supplement (doi:10.1186/s12888-021-03130-4), 2021-03-08
Supplement: MOESM7 [file 18940932]

Supplementary Table: Absolute AME and corresponding relative AME change in ADHD symptoms for one SD increase in PDQI, UPFI and CDQI score

| Diet quality indices | ADHD symptom score       |              |              |              |                             |              |              |              |
|----------------------|--------------------------|--------------|--------------|--------------|-----------------------------|--------------|--------------|--------------|
|                      | Crude model <sup>1</sup> |              |              |              | Adjusted model <sup>2</sup> |              |              |              |
|                      | Absolute AME             | CI           | Relative AME | CI           | Absolute AME                | CI           | Relative AME | CI           |
| <b>PDQI</b>          | -0.45                    | -0.55, -0.34 | -5.3%        | -6.5%, -4.0% | -0.28                       | -0.41, -0.14 | -3.3%        | -4.8%, -1.6% |
| <b>UPFI</b>          | 0.38                     | 0.27, 0.49   | 4.5%         | 3.3%, 5.9%   | 0.25                        | 0.13, 0.38   | 3.0%         | 1.5%, 4.5%   |
| <b>DQI3y</b>         | -0.22                    | -0.35, -0.10 | -2.6%        | -4.2%, -1.2% | -0.06                       | -0.18, 0.06  | -0.7%        | -2.2%, 0.7%  |

Adjustment variables: None

<sup>2</sup> Adjustment variables: For PDQI and UPFI: maternal pre-pregnancy BMI, maternal education, smoking and alcohol intake during pregnancy, maternal symptoms of depression and ADHD, maternal age, parity, child sex, child diet and child birth quarter. For CDQI: maternal pre-pregnancy BMI, maternal education, maternal symptoms of ADHD, maternal age, prenatal diet quality, child sex, parity, child sleep problems (3y) and child birth quarter.
