# Supplementary material for: The associations between maternal and child diet quality and child ADHD – findings from a large Norwegian pregnancy cohort study
Source: Springer Nature journal article supplement (doi:10.1186/s12888-021-03130-4), 2021-03-08
Supplement: MOESM8 [file 18940932]

Supplementary Table: Relative risk for ADHD diagnosis for one SD increase in PDQI, UPFI and CDQI score

| Diet quality indices | ADHD diagnosis           |            |                             |            |
|----------------------|--------------------------|------------|-----------------------------|------------|
|                      | Crude model <sup>1</sup> |            | Adjusted model <sup>2</sup> |            |
|                      | Relative Risk            | CI         | Relative Risk               | CI         |
| <b>PDQI</b>          | 0.78                     | 0.73, 0.84 | 0.87                        | 0.79, 0.97 |
| <b>UPFI</b>          | 1.00                     | 0.93, 1.08 | 1.07                        | 0.99, 1.18 |
| <b>DQI3y</b>         | 0.87                     | 0.79, 0.93 | 0.99                        | 0.90, 1.08 |

<sup>1</sup> Adjustment variables: None

<sup>2</sup> Adjustment variables: For PDQI and UPFI: maternal pre-pregnancy BMI, maternal education, smoking and alcohol intake during pregnancy, maternal symptoms of depression and ADHD, maternal age, parity, child sex, child diet and child birth quarter. For CDQI: maternal pre-pregnancy BMI, maternal education, maternal symptoms of ADHD, maternal age, prenatal diet quality, child sex, parity, child sleep problems (3y) and child birth quarter.
